# Supplementary material
Source: PubMed Central journal article supplement (PMC5330698)
Supplement: supp_the2016-0110_onco12013-sup-0001-suppinfo1.pdf [file supp_the2016-0110_onco12013-sup-0001-suppinfo1.pdf]

Supplemental Table for:  
Aspirin Is Associated with Improved Survival in Severely Thrombocytopenic Cancer Patients with Acute Myocardial Infarction  
Attila Feher et al.

**Table S1. Regression analysis for 30 days – entire patient cohort**

| Variable        | Predictors of overall survival |                  |                         |                | Predictors of cardiovascular death free survival |                  |                         |                |
|-----------------|--------------------------------|------------------|-------------------------|----------------|--------------------------------------------------|------------------|-------------------------|----------------|
|                 | Univariate Odds ratio          | Univariate p     | Multivariate Odds ratio | Multivariate p | Univariate Odds ratio                            | Univariate p     | Multivariate Odds ratio | Multivariate p |
| Aspirin         | <b>0.20 (0.09-0.44)</b>        | <b>&lt;0.001</b> | <b>0.26 (0.09-0.55)</b> | <b>0.001</b>   | <b>0.16 (0.07-0.38)</b>                          | <b>&lt;0.001</b> | <b>0.24 (0.08-0.69)</b> | <b>0.008</b>   |
| Beta blocker    | 0.33 (0.11-1.01)               | 0.053            | N/A                     | N/A            | <b>0.30 (0.10-0.92)</b>                          | <b>0.034</b>     | NS                      | NS             |
| ACE I/ARB       | <b>0.18 (0.06-0.55)</b>        | <b>0.003</b>     | <b>0.20 (0.06-0.66)</b> | <b>0.008</b>   | <b>0.14 (0.04-0.49)</b>                          | <b>0.002</b>     | <b>0.15 (0.03-0.77)</b> | <b>0.024</b>   |
| Statin          | <b>0.34 (0.15-0.73)</b>        | <b>0.006</b>     | NS                      | NS             | <b>0.28 (0.13-0.63)</b>                          | <b>0.002</b>     | NS                      | NS             |
| Low risk stage  | <b>0.26 (0.12-0.58)</b>        | <b>0.001</b>     | <b>0.28 (0.11-0.7)</b>  | <b>0.006</b>   | <b>0.28 (0.13-0.63)</b>                          | <b>0.002</b>     | NS                      | NS             |
| Low/mod ODR     | <b>0.28 (0.13-0.62)</b>        | <b>0.002</b>     | NS                      | NS             | <b>0.26 (0.12-0.57)</b>                          | <b>0.001</b>     | <b>0.29 (0.10-0.85)</b> | <b>0.024</b>   |
| Absence of sTP  | <b>0.26 (0.19-0.60)</b>        | <b>0.001</b>     | NS                      | NS             | <b>0.25 (0.11-0.57)</b>                          | <b>0.001</b>     | NS                      | NS             |
| Prior BMT       | 1.24 (0.48-3.20)               | 0.65             | N/A                     | N/A            | 0.73 (0.34-1.56)                                 | 0.41             | N/A                     | N/A            |
| Diagnosed >2y   | 0.88 (0.41-1.88)               | 0.74             | N/A                     | N/A            | 0.74 (0.25-2.18)                                 | 0.58             | N/A                     | N/A            |
| Plt transfusion | <b>2.16 (1-4.63)</b>           | <b>0.049</b>     | NS                      | NS             | <b>2.21 (1.02-4.79)</b>                          | <b>0.04</b>      | NS                      | NS             |
| EF <45%         | 2.4 (0.99-5.5)                 | 0.052            | N/A                     | N/A            | <b>2.58 (1.09-6.1)</b>                           | <b>0.03</b>      | NS                      | NS             |
| BMI             | 1.05 (0.99-1.11)               | 0.079            | N/A                     | N/A            | <b>1.06 (1.002-1.24)</b>                         | <b>0.04</b>      | NS                      | NS             |
| STEMI           | 1.89 (0.65-5.45)               | 0.24             | N/A                     | N/A            | 2.09 (0.72-6.1)                                  | 0.17             | N/A                     | N/A            |
| Age             | 1 (0.97-1.03)                  | 0.93             | N/A                     | N/A            | 1.0 (0.97-1.03)                                  | 0.99             | N/A                     | N/A            |
| Female          | 1.3 (0.58-2.96)                | 0.53             | N/A                     | N/A            | 1.38 (0.61-3.13)                                 | 0.44             | N/A                     | N/A            |
| Diabetes        | 1.5 (0.66-3.44)                | 0.34             | N/A                     | N/A            | 1.7 (0.74-3.9)                                   | 0.21             | N/A                     | N/A            |
| HTN             | 1.17 (0.39-3.55)               | 0.78             | N/A                     | N/A            | 0.7 (0.33-1.51)                                  | 0.36             | N/A                     | N/A            |

Supplemental Table for:  
Aspirin Is Associated with Improved Survival in Severely Thrombocytopenic Cancer Patients with Acute Myocardial Infarction  
Attila Feher et al.

|                  |                  |       |     |     |                   |      |     |     |
|------------------|------------------|-------|-----|-----|-------------------|------|-----|-----|
| Hodgkin Lymphoma | 0.33 (0.037-2.9) | 0.317 | N/A | N/A | 0.36 (0.04-3.19)  | 0.36 | N/A | N/A |
| WBC count        | 0.99 (0.85-1.22) | 0.96  | N/A | N/A | 0.99 (0.98-1.01)  | 0.58 | N/A | N/A |
| Hemoglobin       | 0.64 (0.31-1.33) | 0.23  | N/A | N/A | 1.001 (0.83-1.23) | 0.93 | N/A | N/A |
| Cr>1.5           | 1.27 (0.57-2.8)  | 0.56  | N/A | N/A | 1.22 (0.54-2.73)  | 0.63 | N/A | N/A |

N/A = not entered into the multivariate model, NS = not significant

Abbreviations - ACE I: Angiotensin Converting Enzyme Inhibitor, ARB: Angiotensin Receptor Blocker, ODR: overall disease risk, sTP: severe thrombocytopenia, BMT: bone marrow transplant, Revasc: revascularization, Plt: platelet, EF: ejection fraction, STEMI: ST elevation myocardial infarction, WBC: white blood cell count, cr: creatinine
